# Supplementary material
Source: PubMed Central journal article supplement (PMC4629995)
Supplement: 10-1055-s-0035-1557841-sup_gf950.pdf [file 10-1055-s-0035-1557841-sup_gf950.pdf]

# Wertigkeit der HPV-Testung zur Triage unklarer zytologischer Befunde der Gruppen Pap II-p, Pap III und Pap IIID – Ergebnisse zweier Langzeitstudien

## Relevance of HPV Screening for Triaging Equivocal Cytology Findings in the Pap II-p, Pap III and Pap IIID Groups – Results of Two Long-Term Studies

Autoren

A. Luyten, K. U. Petry

Institut

Frauenklinik im Klinikum Wolfsburg, Wolfsburg

### Schlüsselwörter

- HPV, human papillomavirus
- Pap II-p
- Pap IIIID
- Triage

### Key words

- HPV, human papillomavirus
- Pap II-p
- Pap IIIID
- triage

### Zusammenfassung

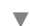

**Einführung:** Der Einsatz der HPV-Testung zur Triage von ASC-US-(atypical squamous cells of undetermined significance-)Zytologiebefunden ist ein durch internationale Studien gut belegter Standard, für andere zytologische Befunde gibt es teils widersprüchliche Daten. In Deutschland fehlen bisher Langzeitstudien zum Nutzen der HPV-Triage.

**Material und Methoden:** Für die vorliegende Untersuchung wurden Daten eines seit 2006 laufenden primären HPV-Screening-Projekts bei Frauen über 30 Jahren und einer seit 2009 laufenden epidemiologischen Studie bei Frauen zwischen 20 und 27 Jahren genutzt. Bei allen Frauen wurden bei Rekrutierung Abstriche für Zytologie und Testung auf „high-risk“-HPV mittels Hybrid Capture 2 (HC2) entnommen. Fielen beide Tests positiv aus oder persistierten auffällige zytologische Befunde oder ein positiver HPV-Test, dann erfolgte eine Abklärung mittels Kolposkopie.

**Ergebnisse:** Insgesamt ergab sich bei 282 Frauen mit Pap II-p, Pap III oder Pap IIID und negativem HPV Test kein Fall einer CIN3+. Bei Frauen unter 30 Jahren waren aber 69% (Pap II-p) bis 85% (Pap IIID) der auffälligen Befunde HPV-positiv, auch bei älteren Frauen mit Pap IIID ergab sich für eine Triage mit 71% eine zu hohe HPV-Prävalenz und bereits ohne Triage ein 23% Risiko für CIN3+. Bei Frauen über 30 Jahren mit Pap-II-p-Befunden waren dagegen nur 21% HPV-positiv, und das Risiko für CIN3+ war in dieser Gruppe mit 29% hoch. Auch für Pap-III-Befunde ergab sich in der Altersgruppe über 30 Jahre bei einer HPV-Prävalenz von 56% für CIN3+ eine effiziente Triage.

**Diskussion:** Zusammenfassend erwies sich die HPV-Triage von Pap-II-p-Befunden bei Frauen über 30 Jahren als effizient, dagegen erschien bei Pap-IIIID-Befunden in dieser Altersgruppe die sofortige Überweisung zur Kolposkopie gerechtfertigt.

### Abstract

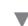

**Introduction:** The use of HPV screening for the triage of ASC-US (atypical squamous cells of undetermined significance) cytology results has been established as a sound standard by international trials whereas the data for other cytology findings are in part contradictory. There is a lack of long-term studies on the use of HPV triage in Germany.

**Materials and Methods:** For the present study data from a primary HPV screening project involving women aged over 30 years, ongoing since 2006, and an epidemiological study on women aged between 20 and 27 years, ongoing since 2009, were used. Upon recruitment, all women underwent a smear test for cytology and screening for “high-risk” HPV using Hybrid Capture 2 (HC2). If both tests were positive or if there were persisting remarkable cytology findings or a positive HPV test, then clarification by colposcopy was performed.

**Results:** Altogether, among 282 women with Pap II-p (ASC-US), Pap III (ASC-H) or Pap IIID (LSIL + CIN2) and negative HPV test there was no case of CIN3+. Among the women under 30 years of age, however, 69% (ASC-US) to 85% (LSIL + CIN2) of the remarkable findings were HPV positive, also among the older women with Pap IIID, the 71% prevalence of HPV was too high for a triage and even without triage there was a 23% risk for CIN3+. On the other hand, of the women over 30 years old with ASC-US (Pap II-p) findings, only 21% were positive for HPV and the risk for CIN3+ in this group was high at 29%. Also for ASC-H (Pap III) findings in the age group of over 30 years with an HPV prevalence of 56% there was an efficient triage for CIN3+.

**Discussion:** In summary, the HPV triage of ASC-US (Pap II-p) findings in women aged over 30 years was found to be efficient; in contrast, LSIL +

eingereicht 19.2.2015

revidiert 24.6.2015

akzeptiert 24.6.2015

### Bibliografie

**DOI** <http://dx.doi.org/10.1055/s-0035-1557841>  
Geburtsh Frauenheilk 2015; 75: 1–5 © Georg Thieme Verlag KG  
Stuttgart · New York ·  
ISSN 0016-5751

### Korrespondenzadresse

**Prof. K. U. Petry**  
Klinikum Wolfsburg  
Obstetrics and Gynaecology  
Sauerbruchstraße 7  
38440 Wolfsburg  
k.u.petry@  
klinikum.wolfsburg.de

tigt während bei jüngeren Frauen die zytologische Kontrolle als ausreichend erschien.

CIN2 (Pap IIID) findings in this age group justified an immediate referral to colposcopy whereas cytology control appeared to be sufficient for younger women.

## Einleitung

Das Zervixkarzinom entsteht fast ausnahmslos aus einem über viele Jahre bis Jahrzehnte persistierenden HPV-Infekt, der zunächst zu Präkanzerosen führt, die ebenfalls für Jahre vorliegen müssen, bevor es zur malignen Transformation kommen kann. Neben der seit 2006 zu Verfügung stehenden Option einer primären Prävention durch eine HPV-Impfung, mit der der gesamte Zyklus vom initialen HPV-Infekt bis zur Krebsentstehung verhindert werden kann, wird seit mehreren Jahrzehnten mittels zytologischem Screening eine sehr erfolgreiche sekundäre Prävention durchgeführt, bei der echte Krebsvorstufen (zervikale intraepitheliale Neoplasie Grad 3 = CIN3) detektiert und zerstört und in Folge die Krebsentstehung verhindert werden kann.

Die bisherige deutsche zytologische Nomenklatur München II klassifizierte unauffällige Befunde als „Pap I/II“, diese werden nach der neuen München-III-Nomenklatur als Pap I zusammengefasst. Für diese größte Gruppe der Screening-Teilnehmerinnen werden bisher jährliche Routineabstriche als ausreichend angesehen. Auffällige Befunde entfallen je nach Altersstruktur pro jährlicher Screening-Runde auf 2,3–3,7% der Teilnehmerinnen [1–3]. Ein auffälliger Abstrich ist nicht mit der Diagnose einer obligaten Krebsvorstufe oder gar einem Karzinom gleichzusetzen. International besteht Konsens, dass die Expertenkolposkopie, also die kolposkopische Untersuchung mit histologischer Abklärung durch gezielte Biopsien und/oder endozervikale Curettage oder sofortige Exzision durch einen speziell in der Kolposkopie ausgebildeten Arzt, den Goldstandard bei der Abklärung auffälliger Vorsorgebefunde darstellt. Die European Federation for Colposcopy (EFC) fordert, dass vor Exzisionsverfahren an der Zervix wie z. B. Konisationen obligat eine entsprechende kolposkopische Untersuchung erfolgen soll [4]. England hat als erstes europäisches Land bereits vor Jahrzehnten ein Netzwerk an spezialisierten, staatlich zertifizierten Kolposkopie-Sprechstunden (Colposcopy clinics) aufgebaut und deren Effizienz durch begleitende Studien verifiziert. So belegen randomisiert kontrollierten Studien, dass in England durch Expertenkolposkopie unnötige Operationen vermieden werden [5] und ein Abklärungsalgorithmus mit Expertenkolposkopie kosteneffizient ist [6], aber auch, dass bei zytologischen Auffälligkeiten geringen Grades nicht alle betroffene Frauen sofort zur Kolposkopie überwiesen werden müssen [7]. Da die Überweisung zur Expertenkolposkopie zu Ängsten und Stress bei betroffenen Frauen führen kann [8], sollten nur Frauen mit einem zumindest moderat erhöhten Risiko für das Vorliegen einer CIN3+ (CIN3, ACIS oder mehr) überwiesen werden. Obwohl es keinen gut validierten Grenzwert gibt, ist die Notwendigkeit einer Überweisung bei einem Risiko von mehr als 20% für eine CIN3 unstrittig. Im deutschen Versorgungsalltag würde dies für die Befundgruppen Pap IV (> 80% CIN3+) und rezidivierende Pap IIID (31,4% CIN3+) gelten [9]. Ein 20%-Cut-off für CIN3+ erscheint in vielen Ländern aber aus forensischer Sicht bedenklich hoch, da in diesen Fällen eine längerfristige Diagnoseverschleppung hingenommen wird. Selbst bei Übernahme des in vielen Ländern üblichen Grenzwerts von 10% wäre aber eine direkte Überweisung etwa von Pap-II-p-Befunden zur Kolposkopie ausgeschlossen. In diesen Fällen sollte eine Triage (Abklärungsdiagnostik), also eine weitere Auslese durch zusätzliche Tests er-

folgen. Bis vor 15 Jahren war es in vielen Ländern mit Vorsorgeprogrammen Standard, bei leicht auffälligen Befunden den Abstrich zu kontrollieren, seither konnten zahlreiche Studien zeigen, dass durch HPV-Testung in diesen Fällen meist eine bessere Triage gelingt. Daher ist die Triage leicht auffälliger zytologischer Befunde entsprechend der Befundgruppe Pap II-p mittels HPV-Testung in vielen europäischen Ländern Standard, aus Deutschland fehlen allerdings systematische prospektive Studien mit Langzeitbeobachtungen.

Das seit 2006 laufende Wolfsburger HPV-Screening-Projekt WOLPHSCREEN (**W**olfsburg **p**rimäry **H**PV **s**creening project) mit mehr als 22 000 Teilnehmerinnen über 30 Jahren und die seit 2009 laufende epidemiologische Studie WOLVES (**W**olfsburg **H**PV **e**pidemiological study) mit gut 1700 Frauen im Alter von 20–27 Jahren erfassen sowohl zytologische Vorsorgebefunde als auch die Ergebnisse der zeitgleich abgenommenen HPV-Testung. Ziel der vorliegenden Untersuchung war es, die Wertigkeit einer HPV-Triage bei Frauen unterschiedlicher Altersgruppen mit Pap II-p, Pap III oder Pap IIID im Langzeitverlauf zu klären. Wir definierten für die Qualität einer HPV-Triage a priori 2 Kriterien:

1. Durch HPV-Triage sollte ein für die gesamte Befundgruppe niedriges CIN3+-Risiko von unter 10% bei positivem Befund auf mehr als 10% ansteigen und/oder
2. um eine signifikante Reduktion der Überweisungen zur Kolposkopie zu erzielen, sollte bei negativem HPV-Befund ein CIN3+-Risiko mit hoher Sicherheit ausgeschlossen sein **und** mindestens 40% der Befundgruppe ein negatives Ergebnis aufweisen.

Der 2. Punkt entspricht in etwa den Zielwerten internationaler Studien [10, 11].

## Methoden und Patientinnen

Studiendesign, Methoden und Patientenkollektive von WOLPHSCREEN und WOLVES wurden andernorts bereits detailliert dargestellt [2, 12].

### WOLPHSCREEN

Kurz zusammengefasst handelt es sich bei WOLPHSCREEN um ein primäres Vorsorgeprojekt für Frauen über 30 Jahren im Großraum Wolfsburg. Bei allen Teilnehmerinnen erfolgt eine Kotesung aus Zytologie und HPV-Testung auf HPV-Hochrisikotypen (HPV-HR) mittels Hybrid Capture 2 (HC2, Qiagen, Hilden, Deutschland). Während bei Frauen mit unauffälligen Befunden (unauffällige Zytologie **und** negativer HPV-Test) erst nach 5 Jahren die nächste Kotesung durchgeführt wird, erfolgt bei Frauen mit auffälliger Zytologie ( $\geq$  Pap II-p) **und** positivem HPV-Test eine sofortige Überweisung zur Kolposkopie, unabhängig vom Schweregrad der zytologischen Auffälligkeit. Frauen mit abnormen Zytologiebefunden und negativem HPV-Status erhielten mit Ausnahme der Gruppen Pap IV/V Abstrichkontrollen nach (6 und) 12 Monaten. Nur bei Persistenz erfolgte die Überweisung zur Kolposkopie. Bei initial lediglich positivem HPV-Test erfolgt eine erneute Testung nach 12 Monaten und eine Vorstellung zur Kolposkopie nur bei HPV-Persistenz.

## WOLVES

Bei WOLVES-Teilnehmerinnen erfolgten im Rahmen der Vorsorge jährlich zytologische Routineabstriche sowie im Rahmen der Studie eine HPV-Testung mittels HC2 und Genotypisierung mittels LiPA (Innogenetics). Nur Frauen, die mit 1. Wohnsitz in Wolfsburg gemeldet sind und 1983/84 oder 1988/89 oder 1993/94 geboren wurden, können in die Studie eingeschlossen werden. In die hier vorgestellte Analyse wurden nur die 2009–2010 erhobenen Daten der Jahrgänge 1983/84 und die 2009–2015 jeweils bei Erstvorstellung erhobenen Daten der Jahrgänge 1988/89 eingeschlossen. Das Alter der eingeschlossenen Frauen lag somit bei 20–27 Jahren. Auch WOLVES-Teilnehmerinnen wurden nur bei auffälligen Zytologien **und** positivem HC2-Befund direkt zur Kolposkopie überwiesen, andernfalls erfolgten zytologische Verlaufskontrollen in den teilnehmenden Praxen.

In beiden Kollektiven wurden zytologische Befunde bis Ende 2013 entsprechend München II eingeteilt, im Jahr 2014 erfolgte teilweise und ab 2015 die vollständige Umstellung auf die München-III-Nomenklatur. Bezogen auf die aktuelle Einteilung ergibt sich somit eine Unschärfe für Pap-IIw-Befunde, die sowohl Pap II-p als auch Pap II-g umfassen und besonders für Pap-IIID-Befunde, die in der aktuellen Nomenklatur in Pap IIID1 und Pap IIID2 unterteilt werden.

## Ergebnisse

### WOLPHSCREEN/Pap II-p/g

Bei den WOLPHSCREEN-Teilnehmerinnen ( $n = 22\,176$ ) wurde bei 233 (1,05%) ein Pap-IIw-(Pap-II-p/-g-)Befund bei Rekrutierung erhoben (● **Abb. 1**). 48 von 233 (20,6%) waren HPV-HR-positiv, von diesen 48 Frauen waren 14 an einer CIN3+ erkrankt (CIN3+-Risiko: 29,2%), während bei 185 Frauen mit negativem HC2-Befund kein Fall einer CIN3+ diagnostiziert wurde. Dabei erfolgte im Verlauf bei 9 Patientinnen eine Überweisung zur Kolposkopie wegen persistierend auffälliger Befunde, von 8 Frauen fehlten Kontrollen, bei den verbleibenden Frauen ergaben sich im Verlauf unauffällige Befunde. Damit erfüllte die HPV-Testung bei Pap IIw/II-p/-g bei Frauen über 30 Jahre beide Kriterien für eine sinnvolle Triage mit einer Reduktion der Überweisungen zur Kolposkopie um 79,4% und einem CIN3+-Risiko für HPV-positive Fälle, das mit knapp 30% deutlich über dem Cut-off von 10% lag.

### WOLPHSCREEN/Pap III

Auch bei 74 WOLPHSCREEN-Teilnehmerinnen mit Pap-III-Befunden (0,33%) fanden sich alle 22 CIN3+-Fälle unter den 39 Frauen mit positiven HC2-Befunden (CIN3+-Risiko: 56,4%), dagegen ergab der Verlauf bei 35 Frauen mit HC2-negativem Befund keinen Fall einer CIN3+ (● **Abb. 2**). Eine Patientin war allerdings an einem Endometriumkarzinom erkrankt. Insgesamt 7 von 35 Frauen wurden im Verlauf wegen persistierender Befunde oder bei Hinweis auf glanduläre Neoplasien zur Kolposkopie überwiesen. Dabei konnten zervikale Neoplasien ausgeschlossen werden. Die Verläufe der verbleibenden Patientinnen waren unauffällig mit normalen Zytologiebefunden und negativen HPV-Testen. Somit erfüllte die HPV-Triage bei Frauen über 30 Jahren mit Pap-III-Befunden mit der Reduktion der Überweisungen zur Kolposkopie um 47,3% ein Kriterium für eine sinnvolle Triage.

### WOLPHSCREEN/Pap IIID

168 WOLPHSCREEN-Teilnehmerinnen wiesen bei Rekrutierung einen Pap-IIID-Befund auf (0,76%). 120 von 168 Fällen waren

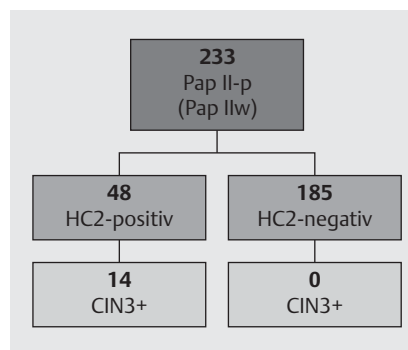

**Abb. 1** HPV-Triage Pap IIw/Pap II-p/Pap II-g bei Frauen über 30 Jahren.

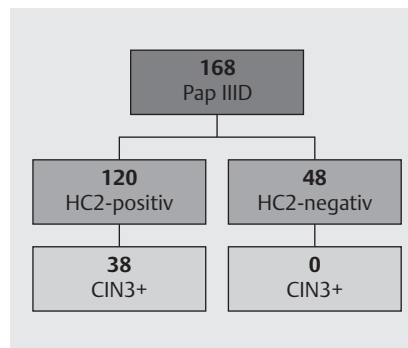

**Abb. 2** HPV-Triage Pap IIID bei Frauen über 30 Jahren.

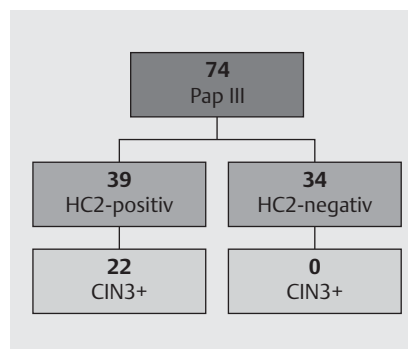

**Abb. 3** HPV-Triage Pap III bei Frauen über 30 Jahren.

HC2-positiv (71,4%), alle 38 Fälle mit CIN3+ fanden sich in dieser Gruppe (CIN3+-Risiko: 31,7%). 7 von 48 HC-negativen Frauen wurden wegen Befundpersistenz im Verlauf zur Kolposkopie überwiesen, dabei fand sich kein Fall einer CIN3+; bei den verbleibenden 41 Frauen ergaben sich im Verlauf unauffällige Zytologien und negative HPV-Testergebnisse (● **Abb. 3**). Dennoch erfüllte die HPV-Triage hier keines der Kriterien für eine sinnvolle Triage bei Frauen über 30 Jahren mit Pap-IIID-Befunden.

### WOLVES/Pap II-p/g

Bei den 20–27 Jahre alten WOLVES-Teilnehmerinnen ( $n = 1749$ ) wiesen 28 Frauen einen Pap IIw/II-p/-g Befund auf, in 19 Fällen ergab sich ein positiver, bei 9 Frauen ein negativer HPV-Test (31%). Bei 5 der 19 Frauen mit positivem HC2 erbrachte die weitere Abklärung eine CIN3 (26,4%), dagegen fand sich in der Verlaufsbeobachtung aller HPV-negativen Fälle lediglich eine CIN1.

### WOLVES/Pap III und Pap IIID

Pap-III-Befunde waren so selten ( $n = 4$ , alle HC2-HR-positiv), dass für diese Befundgruppe keine weitere Analyse erfolgte. Bei 35

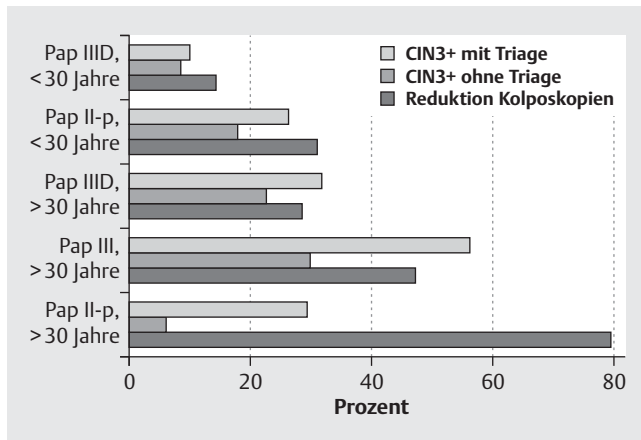

**Abb. 4** Effekte der HPV-Triage. Reduktion der Überweisung zur Kolposkopie bei HPV-negativen Fällen und Darstellung des allgemeinen Risikos für CIN3+ ohne Triage sowie mit Triage für HPV-positive Fälle.

Frauen wurde ein Pap-IIID-Befund erhoben. Bei nur 5 dieser Frauen (14,3%) ergab sich ein negativer HC2-Test, bei allen kam es im weiteren Verlauf zu unauffälligen Zytobefunden bei weiterhin negativen HPV-Testergebnissen. Von den 30 Frauen mit Pap IIID und positivem HC2-Test waren lediglich 3 an einer CIN3 erkrankt.

## Diskussion

Unsere Ergebnisse zeigen eine sehr gute Tauglichkeit der HPV-Testung zur Triage von Pap II w/II-p/-g-Befunden bei Frauen über 30 Jahren. Für HPV-positive Frauen mit Pap II-p/-g bestand ein ähnlich hohes Risiko für eine CIN3+ wie für gleichaltrige Frauen mit Pap IIID und positivem HC2 (29,2 bzw. 31,7%). Dagegen lag die Rate an CIN 3+ für alle Teilnehmerinnen mit Pap II-p bei lediglich 6,3% und damit deutlich unter dem Grenzwert von 10%, ab dem eine direkte Überweisung zur Kolposkopie gerechtfertigt wäre (Abb. 4). Die aktuelle Empfehlung, bei Pap II-p/-g den Abstrich in einem Jahr zu wiederholen [13] hätte im untersuchten Kollektiv zu einer Diagnoseverschleppung bei 14 CIN3+ geführt, sodass aufgrund der hier vorgestellten Daten eine Triage mittels HPV-Testung in der Altersgruppe über 30 Jahren vorteilhaft erscheint.

Im Gegensatz zu der sehr effizienten Triage von Frauen mit Pap II-p/-g, lagen die CIN3+-Raten für Pap IIID mit 22,6% und für Pap III mit 29,8% bei Frauen über 30 Jahren deutlich über dem Grenzwert von 10% und selbst über dem unstrittigen Grenzwert von 20%, sodass hier eine direkte Abklärung durch Kolposkopie vertretbar erscheint. Die neue München-III-Nomenklatur wurde erst 2014 eingeführt, sodass die Mehrzahl der hier analysierten Fälle nach München II klassifiziert wurde. Leider konnten wir insbesondere bei Pap-IIID-Befunden nicht immer nachvollziehen, ob nach der aktuellen München-III-Klassifikation ein Pap-II-ID1 oder ein Pap-IIID2-Befund vorgelegen hätte. Angesichts des hohen negativen Vorhersagewerts bei negativem HPV-Test können wir somit nicht ausschließen, dass eine HPV-Triage bei Pap-IIID1-Befunden dennoch eine sinnvolle Option darstellt, eine Empfehlung lässt sich aber aus unseren Ergebnissen nicht ableiten. Grundsätzlich kann dagegen bei Pap-III-Befunden bei Frauen über 30 Jahren eine HPV-Triage erwogen werden, da ein Risiko

für CIN3+ bei HPV-negativen Frauen weitgehend ausgeschlossen ist und sich die Rate an Überweisungen zur Kolposkopie um 47% reduzieren ließe. In dieser Gruppe müssen aber HPV-unabhängige Karzinome, insbesondere das Endometriumkarzinom sicher ausgeschlossen werden.

In der Altersgruppe unter 30 Jahren ist der Nachweis von HR-HPV mit insges. mehr als 23% sehr häufig [2] und auffällige zytologische Befunde der Gruppe III/IIID sind zu mehr als 80% mit HPV assoziiert. Bei jungen Frauen waren auch Pap-II-p/-g-Befunde zu mehr als zwei Dritteln HPV-positiv, obwohl wir angesichts der relativ geringen WOLVES-Fallzahlen nicht ausschließen können, dass sich in einem größeren Kollektiv und bei Fokussierung auf die Altersgruppe 25 bis 30 Jahre eine vorteilhaftere Analyse ergeben könnte.

Neben der nicht perfekten Übertragbarkeit der Pap-IIID-Befunde von der München-II- in die München-III-Nomenklatur ist ein grundsätzlich berechtigter Kritikpunkt, dass die Vorgehensweise abhängig vom HPV-Status unterschiedlich war und dadurch möglicherweise CIN3+-Fälle bei HPV-negativen Frauen übersehen wurden. Während mehr als 95% der HPV-positiven Frauen zur Kolposkopie überwiesen wurden, lag die entsprechende Rate bei HPV-negativen Patienten nur bei gut 10%. Dennoch halten wir die Wahrscheinlichkeit für das Übersehen einer CIN3 in dieser Gruppe für sehr gering. Die Compliance der Patientinnen war und ist sehr gut, durch Datenabgleich mit dem epidemiologischen Krebsregister und den Datenbanken der Krankenkassen können wir außerhalb des Projekts diagnostizierte CIN3+-Fälle ausschließen. Von mehr als einem Drittel der HPV-negativen Frauen dieser Untersuchung ohne Kolposkopie (87 von 245) liegen Langzeitverläufe von mehr als 6 Jahren vor, in den verbleibenden Fällen ist der Verlauf kürzer, aber durchgehend ohne jeglichen Hinweis auf CIN3+.

Neben der HPV-Testung und der Wiederholung des zytologischen Abstrichs steht inzwischen mit der immunzytochemischen Doppelfärbung von p16 und Ki-67 ein weiteres Triageverfahren für unklare zytologische Befunde und HPV-positive Fälle zur Verfügung [14–16], und verschiedene Methylierungsmarker befinden sich in der Erprobung. Der p16/Ki-67-Nachweis erwies sich in 2 Studien bei Pap-II-p- und Pap-IIID1-Befunden als ebenso sensitiv wie HPV-Testung für die Detektion von CIN2+-Fällen bei besserer Spezifität. Aufgrund der hier dargestellten Schwächen der HPV-Triage bei jungen Frauen und bei Pap-IIID-Befunden erscheint die weitere Abklärung mittels Immunzytochemie in diesen Fällen als besser geeignet.

## Schlussfolgerung

In Übereinstimmung mit internationalen Studien ergibt sich auch für Deutschland bei Frauen, die älter als 30 Jahre sind, eine effiziente Triage von geringgradigen zytologischen Auffälligkeiten der Befundgruppe Pap II-p/-g durch HR-HPV-Testung. Bei HPV-positiven Fällen ist die Überweisung zur Expertenkolposkopie indiziert, für HPV-negative Fälle ist das Risiko für CIN3+ dagegen minimal. Auch bei Pap-III-Befunden führte die HPV-Triage in dieser Altersgruppe zur Abgrenzung einer relevanten HPV-negativen Untergruppe ohne Risiko für CIN3+, allerdings mit Risiko für Endometriumkarzinome. Dagegen erscheint HPV-HR-Testung zur Triage von Pap-IIID-Befunden bei Frauen unter 30 Jahren als ungeeignet, da die überwiegende Mehrzahl dieser Befunde mit HPV assoziiert ist.

## Finanzierung

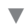

WOLPHSCREEN ist ein Pilotprojekt der Deutschen BKK und Audi BKK im Raum Wolfsburg und wird durch diese Krankenkassen finanziert.

WOLVES ist eine vom Klinikum Wolfsburg durchgeführte epidemiologische Studie, die wesentlich durch Sanofi Pasteur MSD finanziert wird.

WOLPHSCREEN und WOLVES werden durch die Firma Hologic mit kostenfreien ThinPrep-Röhrchen unterstützt.

## Interessenkonflikt

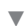

KUP: Gelegentliche Beratertätigkeit für Roche Diagnostik. Rednerhonorare von BD, Roche und Seegene. AL: Rednerhonorare von BD und Qiagen.

## Literatur

- 1 Petry KU, Menton S, Menton M et al. Inclusion of HPV testing in routine cervical cancer screening for women above 29 years in Germany: results for 8466 patients. *Br J Cancer* 2003; 88: 1570–1577
- 2 Petry KU, Luyten A, Justus A et al. Prevalence of high-risk HPV types and associated genital diseases in women born in 1988/89 or 1983/84—results of WOLVES, a population-based epidemiological study in Wolfsburg, Germany. *BMC Infect Dis* 2013; 13: 135
- 3 Petry KU, Rinnau F, Bohmer G et al. Annual Papanicolaou screening for 5 years among human papillomavirus-negative women. *BMC Cancer* 2013; 13: 379
- 4 Moss EL, Arbyn M, Dollery E et al. European Federation of Colposcopy quality standards Delphi consultation. *Eur J Obstet Gynecol Reprod Biol* 2013; 170: 255–258
- 5 TOMBOLA Group. Biopsy and selective recall compared with immediate large loop excision in management of women with low grade abnormal cervical cytology referred for colposcopy: multicentre randomised controlled trial. *BMJ* 2009; 339: b2548
- 6 TOMBOLA Group. Options for managing low grade cervical abnormalities detected at screening: cost effectiveness study. *BMJ* 2009; 339: b2549
- 7 TOMBOLA Group. Cytological surveillance compared with immediate referral for colposcopy in management of women with low grade cervical abnormalities: multicentre randomised controlled trial. *BMJ* 2009; 339: b2546
- 8 Kitchener HC, Fletcher I, Roberts C et al. The psychosocial impact of human papillomavirus testing in primary cervical screening—a study within a randomized trial. *Int J Gynecol Cancer* 2008; 18: 743–748
- 9 Petry KU, Böhmer G, Iftner T et al. Factors associated with an increased risk of prevalent and incident grade III cervical intraepithelial neoplasia and invasive cervical cancer among women with Papanicolaou tests classified as grades I or II cervical intraepithelial neoplasia. *Am J Obstet Gynecol* 2002; 186: 28–34
- 10 Solomon D, Schiffman M, Tarone R. Comparison of three management strategies for patients with atypical squamous cells of undetermined significance: baseline results from a randomized trial. *J Natl Cancer Inst* 2001; 93: 293–299
- 11 Szarewski A, Ambroisine L, Cadman L et al. Comparison of predictors for high-grade cervical intraepithelial neoplasia in women with abnormal smears. *Cancer Epidemiol Biomarkers Prev* 2008; 17: 3033–3042
- 12 Luyten A, Buttmann-Schweiger N, Luyten K et al. Early detection of CIN3 and cervical cancer during long-term follow-up using HPV/Pap smear co-testing and risk-adapted follow-up in a locally organised screening programme. *Int J Cancer* 2014; 135: 1408–1416
- 13 Griesser H, Marquardt K, Jordan B et al. Das Prozedere bei auffälligen Befunden. Kommentar zur Münchner Nomenklatur III. *Frauenarzt* 2015; 56: 10–13
- 14 Ikenberg H, Bergeron C, Schmidt D et al. Screening for cervical cancer precursors with p16/Ki-67 dual-stained cytology: results of the PALMS study. *J Natl Cancer Inst* 2013; 105: 1550–1557
- 15 Petry KU, Schmidt D, Scherbring S et al. Triaging Pap cytology negative, HPV positive cervical cancer screening results with p16/Ki-67 Dual-stained cytology. *Gynecol Oncol* 2011; 121: 505–509
- 16 Schmidt D, Bergeron C, Denton KJ et al. p16/ki-67 dual-stain cytology in the triage of ASCUS and LSIL papanicolaou cytology: results from the European equivocal or mildly abnormal Papanicolaou cytology study. *Cancer Cytopathol* 2011; 119: 158–166
